# Supplementary material for: Separation of lutidines by enclathration
Source: Royal Society of Chemistry journal article supplement (doi:10.1039/c5ce01637a), 2015-01-01

# Separation of Lutidines by Enclathration

Marivel Samipillai<sup>a</sup>, Eustina Batisai,<sup>a</sup> Luigi R. Nassimbeni<sup>a</sup> and Edwin Weber<sup>b</sup>

*a. Department of Chemistry, University of Cape Town, Rondebosch 7701, South Africa Fax: +27 (21) 650 5419; Tel: +27 (21) 650 5893. E-mail: Luigi.Nassimbeni@uct.ac.za*

*b. Institut für Organische Chemie, Technische Universität, Bergakademie Freiberg, Leipziger Strasse 29, D-09596 Freiberg/Sachsen, Germany*

## Content

- Figure S1** 2D fingerprint plots generated from the Hirshfeld surface of the guest molecules in structures H3·2(2,3-LUT) and H3·2(3,4-LUT).
- Table S1** <sup>1</sup>H NMR values for hosts and guest pairs.
- Table S2** <sup>1</sup>H NMR values of additional Dutch resolution attempts carried out by the different combination of hosts (H1/H3 and H2/H3) with equimolar mixture of 2,3-LUT/3,4-LUT.
- Table S3** Details of Hydrogen bonds.
- Figure S2** <sup>1</sup>H NMR results of additional Dutch resolution attempts carried out by the different combination of hosts (H1/H3 and H2/H3) with equimolar mixture of 2,3-LUT/3,4-LUT.

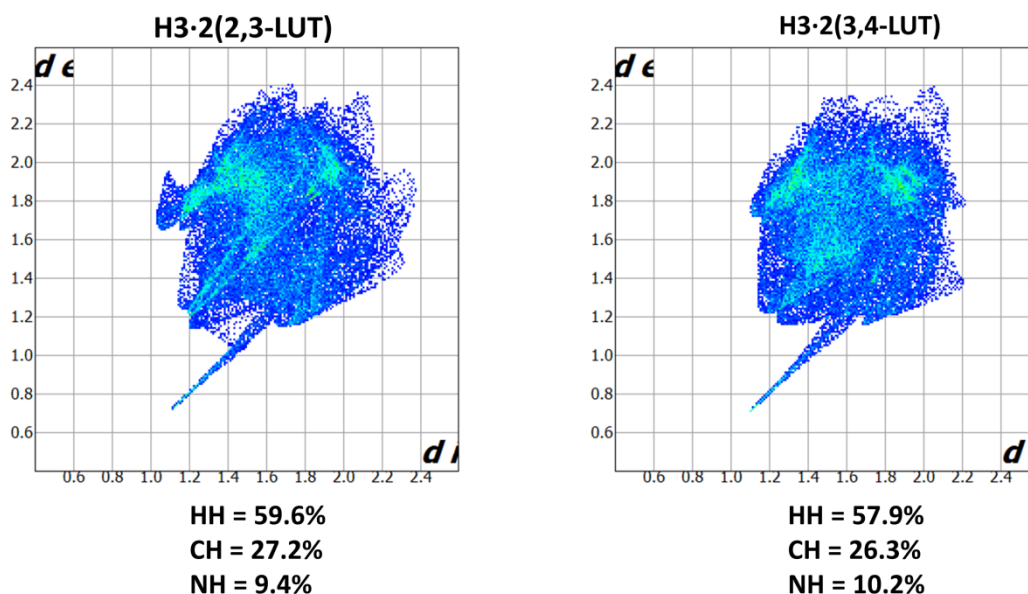

**Figure S1** 2D fingerprint plots generated from the Hirshfeld surface of the guest molecules in structures H3·2(2,3-LUT) and H3·2(3,4-LUT).

**Table S1** <sup>1</sup>H NMR values for hosts and guest pairs

| Experiment             | Guest pair                  | H1.(2,3-LUT/<br>3,4-LUT) | H2.(2,3-LUT/<br>3,4-LUT) | H3.(2,3-LUT/<br>3,4-LUT) |
|------------------------|-----------------------------|--------------------------|--------------------------|--------------------------|
| Solution concentration | <i>X</i> <sub>2,3-LUT</sub> | 0.5                      | 0.5                      | 0.5                      |
|                        | <i>X</i> <sub>3,4-LUT</sub> | 0.5                      | 0.5                      | 0.5                      |
| <sup>1</sup> H NMR     | <i>Z</i> <sub>2,3-LUT</sub> | 0.59                     | 0.62                     | 0.00                     |
|                        | <i>Z</i> <sub>3,4-LUT</sub> | 0.41                     | 0.38                     | 1.00                     |
| X-Ray                  | <i>Z</i> <sub>2,3-LUT</sub> | 0.63                     | 0.69                     | 0.00                     |
|                        | <i>Z</i> <sub>3,4-LUT</sub> | 0.37                     | 0.31                     | 1.00                     |

**Table S2** <sup>1</sup>H NMR values of additional Dutch resolution attempts carried out by the different combination of hosts (H1/H3 and H2/H3) with equimolar mixture of 2,3-LUT/3,4-LUT.

| Name of Experiments                      | Solution concentration      |                             | <sup>1</sup> H NMR          |                             | X-Ray                                 |                                       | Comments                                                                                                                                                                                                                                                          |
|------------------------------------------|-----------------------------|-----------------------------|-----------------------------|-----------------------------|---------------------------------------|---------------------------------------|-------------------------------------------------------------------------------------------------------------------------------------------------------------------------------------------------------------------------------------------------------------------|
|                                          | <i>X</i> <sub>2,3-LUT</sub> | <i>X</i> <sub>3,4-LUT</sub> | <i>Z</i> <sub>2,3-LUT</sub> | <i>Z</i> <sub>3,4-LUT</sub> | <i>Z</i> <sub>2,3-LUT</sub>           | <i>Z</i> <sub>3,4-LUT</sub>           |                                                                                                                                                                                                                                                                   |
| <b>H1/H2.<br/>(2,3-LUT/<br/>3,4-LUT)</b> | 0.5                         | 0.5                         | I = 0.64<br>II = 0.61       | I = 0.36<br>II = 0.39       | I = 0.60<br>II = NA                   | I = 0.40<br>II = NA                   | (i) I is similar to H1·2(2,3-LUT/3,4-LUT) and II is similar to H2·2(2,3-LUT/3,4-LUT)<br><br>(ii) NA = tiny crystals, could not be characterized by X-ray.                                                                                                         |
| <b>H1/H3.<br/>(2,3-LUT/<br/>3,4-LUT)</b> | 0.5                         | 0.5                         | III = 0.65<br>IV = NA       | III = 0.35<br>IV = NA       | III = *Cell check<br>IV = *Cell check | III = *cell check<br>IV = *Cell check | (i) III is similar to H1·2(2,3-LUT/3,4-LUT) and IV is similar to H3·2,3-LUT<br><br>(ii) *Cell parameters were confirmed by X-ray.<br><br>(iii) NA = could not be characterized due to less quantity.                                                              |
| <b>H2/H3.<br/>(2,3-LUT/<br/>3,4-LUT)</b> | 0.5                         | 0.5                         | V = 0.60<br>VI = 0.07       | V = 0.40<br>VI = 0.93       | NIL*                                  | NIL*                                  | (i) V = Similar to H2·2(2,3-LUT/3,4-LUT) and VI = Similar to H3·3,4-LUT<br><br>(ii) *No X-ray experiment was done in both the cases due to poor quality of the crystals and the NMR spectra were identical to H2·2(2,3-LUT/3,4-LUT) and H3·3,4-LUT, respectively. |

**Table S3** Details of Hydrogen bonds

| Compound name      | D-H...A       | D...H/Å  | H...A/Å  | D...A/Å  | ∠D-H...A/° |
|--------------------|---------------|----------|----------|----------|------------|
| H1.2,3-LUT         | O14-H14...N24 | 0.96     | 1.77     | 2.811(1) | 169(1)     |
| H1.3,4-LUT         | O14-H14...N24 | 0.97(2)  | 1.84(2)  | 2.791(2) | 165(1)     |
| H1.2,3-LUT/3,4-LUT | O13-H13...N23 | 0.952(1) | 1.638(9) | 2.568(6) | 165 (2)    |
|                    | O13-H13...N31 | 0.952(1) | 2.048(1) | 2.968(6) | 161.9(17)  |
| H2.2,3-LUT         | O13-H13...N40 | 0.97     | 1.84     | 2.796(3) | 169.3      |
|                    | O13-H13...N32 | 0.97     | 1.84     | 2.769(5) | 159.4      |
| H2.3,4-LUT         | O14-H14...N62 | 0.95     | 1.78     | 2.721(2) | 171.7      |
|                    | O41-H41...O14 | 0.88     | 1.89     | 2.752(2) | 163.6      |
| H2.2,3-LUT/3,4-LUT | O14-H14...N32 | 1.04     | 1.71     | 2.718(4) | 161.7      |
|                    | O14-H14...N41 | 1.04     | 1.92     | 2.861(6) | 148.7      |
| H3.2,3-LUT         | O14-H14...N20 | 0.97     | 1.85     | 2.788(1) | 161.6      |
| H3.3,4-LUT         | O14-H14...N20 | 0.97     | 1.82     | 2.792(1) | 176.9      |

**Figure S2**  $^1\text{H}$  NMR results of additional Dutch resolution attempts carried out by the different combination of hosts (H1/H3 and H2/H3) with equimolar mixture of 2,3-LUT/3,4-LUT.

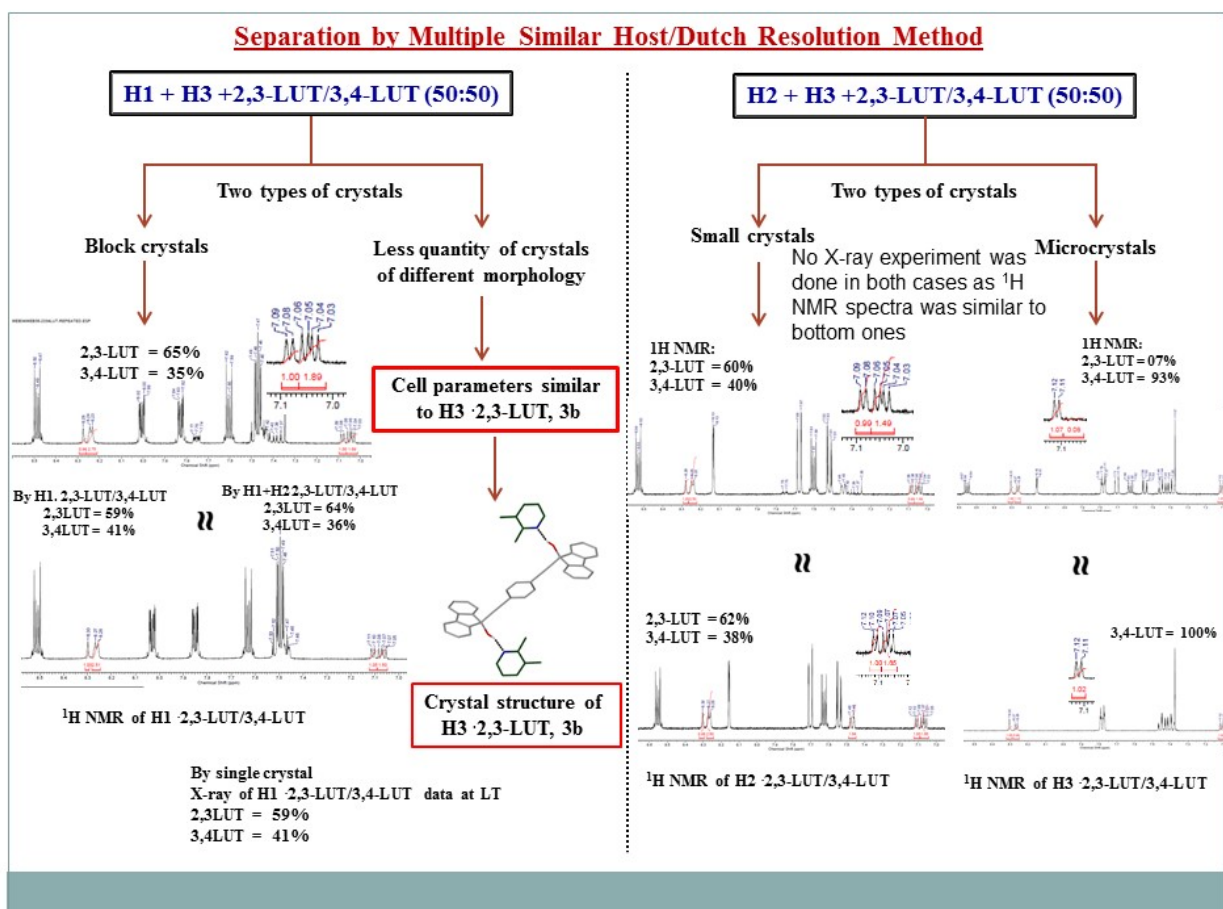

Supplement: c5ce01637a1.pdf [file c5ce01637a1.pdf]
